# Supplementary material for: Formation of parallel aligned nano-fibrils of poly(3,3′′′-didodecylquaterthiophene) induced by the unimer coils in solution
Source: Royal Society of Chemistry journal article supplement (doi:10.1039/c3ra40719e), 2013-01-01
Supplement: c3ra40719e.pdf [file c3ra40719e.pdf]

## Supporting Information

### Formation of Parallel Aligned Nano-fibrils of Poly(3,3''''-didodecylquaterthiophene) Induced by the Single Chains in Solution

*Yaozhuo Xu, Jiangang Liu, Haiyang Wang, Lidong Zheng and Yanchun Han\**

State Key Laboratory of Polymer Physics and Chemistry, Changchun Institute of Applied Chemistry, Chinese Academy of Sciences, 5625 Renmin Street, Changchun 130022, P. R. China; University of the Chinese Academy of Sciences, No.19A Yuquan Road, Beijing 100049, China.

### **The morphology of PQT-12 films with different molecular weight**

PQT-12 was fractionized by gradual precipitation.<sup>[1]</sup> The fractionations formed in a PQT-12 solution in a good solvent with a stepped addition of non-solvent to form precipitations. For example, PQT-12 was first dissolved in THF at a high temperature (90°C). Then the solution was cooled down to room temperature in several minutes, followed by a centrifugation at 9000 rpm for 20 min. After the solid was collected, acetone was added into the remaining solution. Then the solution was heated to 90 °C, cooled down to room temperature and centrifuged (9000 rpm, 10 min). The solid obtained was collected. Such fractionation process was repeated for several times with increasing the amount of acetone gradually, and then the solids were collected by centrifugation. The  $M_n$  and PDI of all fractions were determined by GPC. We named the PQT-12 with different molecular weight as PQT-1# (27 kDa), PQT-2# (21 kDa), and PQT-3# (15 kDa).

TEM was used to observe the differences between their morphologies (Figure S1). PQT-1#, PQT-2#, PQT-3# with a quite similar morphology was observed, which were parallel aligned fibrils. The AFM image (Figure S1c) of PQT-2# (21 kDa) further confirmed the parallel aligned nano-fibrils. At the same time, some rods were found with the parallel fibers. The orientation of these rods was random. The length of these rods was much shorter than the parallel fibrils. PQT-1#, PQT-2#, PQT-3# had diffraction peaks at the same position. (Figure S2)

## Figure Captions

### Figure S1

TEM images of drop-cast films of PQT-12 with different molecular weights: (a) 26 kDa, (b) 21 kDa, (c) AFM phase image of the PQT-2# (21 kDa) in an area of  $2\ \mu\text{m} \times 2\ \mu\text{m}$ , (d) The TEM image of PQT-2# (15 kDa). The inset is the SAED pattern of the film. All the samples were dissolved in CB with the same concentration of 0.1 mg/mL.

### Figure S2

The GI-XRD profile of drop-cast films of PQT-2# with different molecular weights

### Figure S3

The chemical structure of PQT-12

### Figure S4

The semiquantitative energy schematic of the system. The energy barrier ( $\Delta E_1$ ) of the inter-conversion between unimer coils and aggregates was estimated by Arrhenius equation.

$$\ln(k) = \ln(A) - \frac{E_a}{R} \left( \frac{1}{T} \right) \quad (1)$$

Where  $k$  is rate constant (assuming that the solution undergoes the same time to reach equilibrium and using data of different unimer coil population to substitute the rate constant) and pre-exponential factor ( $A$ ), energy barrier ( $E_a$ ), gas constant ( $R$ ), absolute temperature ( $T$ ). The energy barrier could be estimated by solving these

equations with the different population data (19.9%, 34.5%) at different temperature (274 K, 293 K). The energy barrier  $E_a$  is about 21 kJ/mol.

**Figure S1**

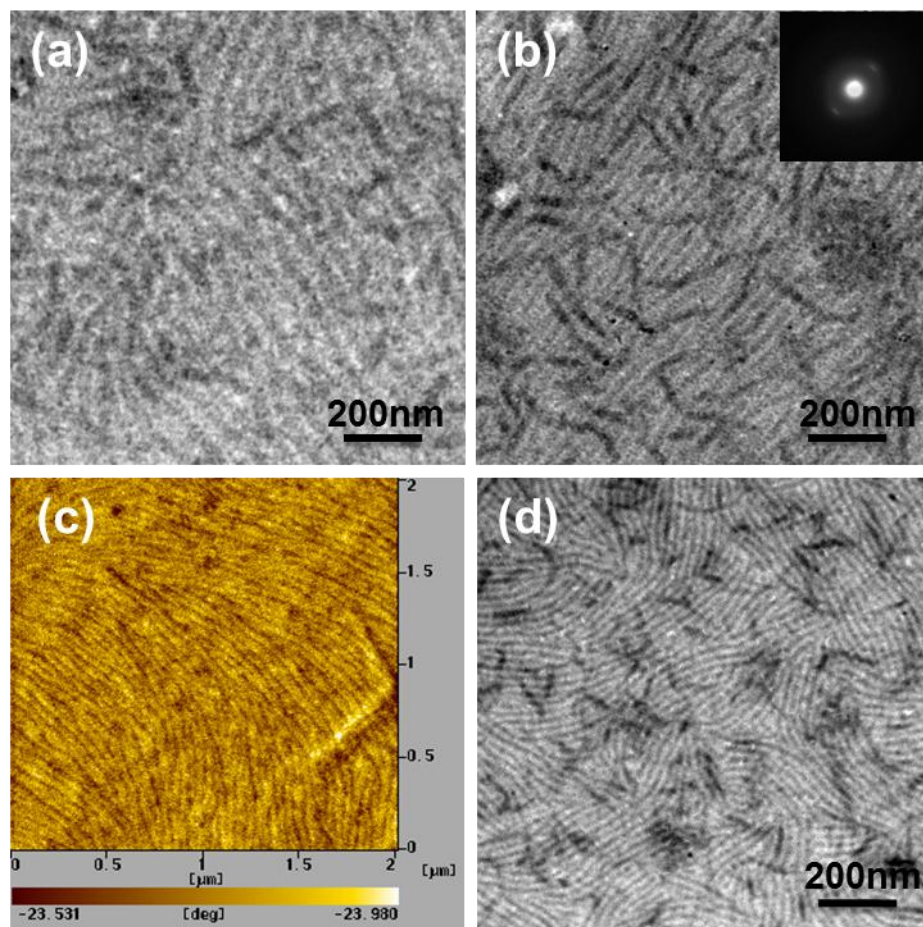

Figure S2

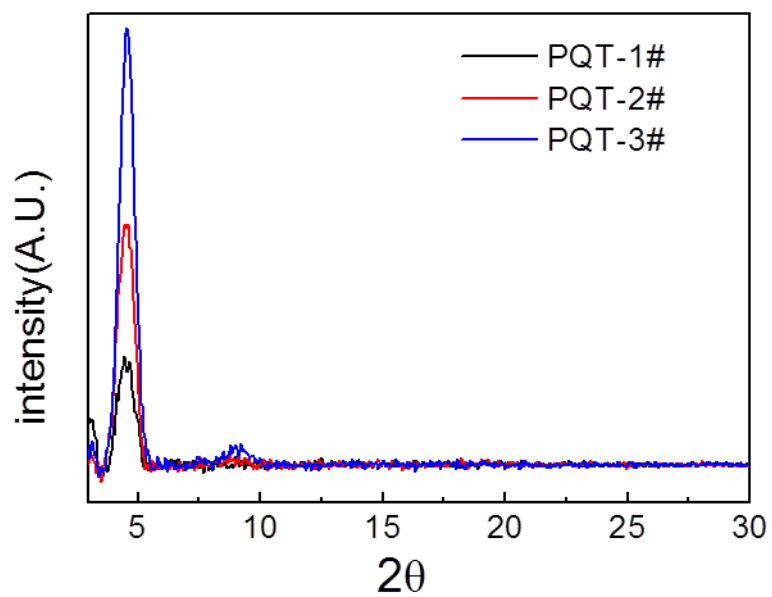

Figure S3

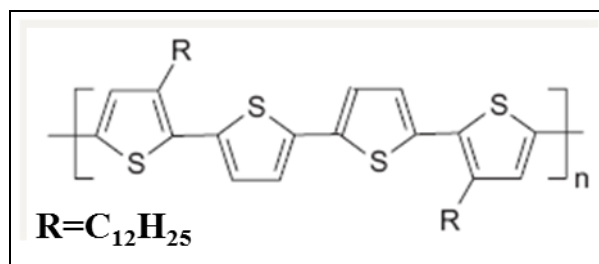

Figure S4

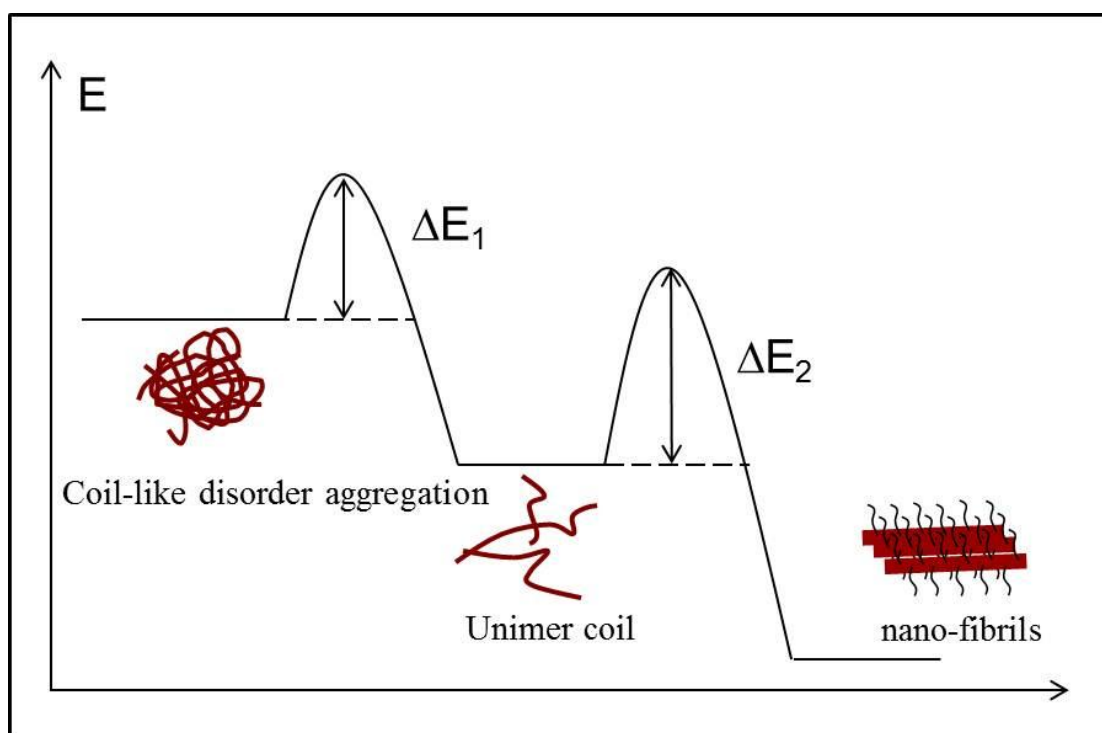

## References

- [1] J. Liu, I. A. Mikhaylov, J. Zou, I. Osaka, A. E. Masunov, R. D. McCullough, L. Zhai, *Polymer* **2011**, 52, 2302.
